# Supplementary material for: Parrotfish grazing ability: interspecific differences in relation to jaw-lever mechanics and relative weight of adductor mandibulae on an Okinawan coral reef
Source: PeerJ. 2016 Sep 1;4:e2425. doi: 10.7717/peerj.2425 (PMC5012275; doi:10.7717/peerj.2425)
Supplement: Data S1 [file peerj-04-2425-s002.xlsx]

## Sheet: Sheet1
Species	FL	ratio
S. forsteni	145	5.59048
S. forsteni	160.5	6.62963
S. forsteni	165.5	5.88095
S. forsteni	170.5	6.52747
S. forsteni	181.5	4.38776
S. forsteni	184	5.22464
S. forsteni	211	5.58278
S. forsteni	211.5	6.62025
S. forsteni	214	5.95455
S. forsteni	214.5	5.59716
S. forsteni	217.5	7.35294
S. forsteni	226	4.56962
S. forsteni	229	8.33043
S. forsteni	232	7.45045
S. forsteni	239	4.19626
S. forsteni	242	6.35514
S. forsteni	244	5.03279
S. forsteni	251	9.00976
S. forsteni	256.5	6.2069
S. forsteni	267.5	4.23626
S. forsteni	280	6.40351
S. forsteni	285	5.8
S. forsteni	297	8.61017
S. forsteni	303.5	5.14407
C. sordidus	149.5	6.67
C. sordidus	151.5	9.77108
C. sordidus	160	9.9802
C. sordidus	163	9.22449
C. sordidus	164	13.2892
C. sordidus	170	9.48684
C. sordidus	171	16.9634
C. sordidus	177	7.52336
C. sordidus	179	9.42308
C. sordidus	179	17.3841
C. sordidus	180.5	14.1074
C. sordidus	185	16.5843
C. sordidus	189	16.3523
C. sordidus	191	15.6738
C. sordidus	191.5	10.8507
C. sordidus	192	12.275
C. sordidus	192.5	16.9913
C. sordidus	195.5	11.202
C. sordidus	199	12.5114
C. sordidus	199	13.011
C. sordidus	203.5	20.4342
C. sordidus	208	14.5091
C. sordidus	208.5	15.7188
C. sordidus	210	17.2273
C. sordidus	211	28.9688
C. sordidus	215	11.4174
C. sordidus	218	27.6667
C. sordidus	218	22.35
C. sordidus	229	23.26
C. sordidus	229	26.0339
C. sordidus	233	9.34653
C. sordidus	234	14.0769
C. sordidus	236	14.875
S. niger	166	5.46154
S. niger	167	6.19101
S. niger	169	7.08547
S. niger	180.5	6
S. niger	185	5.39333
S. niger	197.5	4.24176
S. niger	203.5	7.11364
S. niger	204	7.68657
S. niger	206	8.97727
S. niger	207	5.11628
S. niger	215	6.68056
S. niger	218	6.83333
S. niger	245	7.34167
S. niger	254	6.8
S. niger	255.5	7.74627
S. niger	258	9.27619
S. niger	264	7.83898
S. niger	271	10.9032
S. niger	282	8.625
S. niger	288	9.01899
C. bowersi	179.5	10.127
C. bowersi	187	13.2436
C. bowersi	187	9.29688
C. bowersi	188	7.40212
C. bowersi	190	9.93548
C. bowersi	190.5	17.1061
C. bowersi	193	19.2787
C. bowersi	196	16.2698
C. bowersi	198	18.6
C. bowersi	200	18.7333
C. bowersi	203.5	11.5955
C. bowersi	207	17.0652
C. bowersi	214	14.3214
C. bowersi	216.5	18.2364
C. bowersi	217	18.6944
C. bowersi	218	22.5246
C. bowersi	219.5	20.6338
C. bowersi	221.5	14.414
C. bowersi	224.5	19.3015
C. bowersi	225.5	15.4
C. bowersi	227	22.4
C. bowersi	238	12.0438
C. bowersi	265.5	16.5909
S. rivulatus	154	6.03448
S. rivulatus	163	10.4833
S. rivulatus	166.5	10.0833
S. rivulatus	170.5	10.5888
S. rivulatus	172.5	4.55
S. rivulatus	176.5	6.06838
S. rivulatus	178	11.25
S. rivulatus	179	9.33553
S. rivulatus	184	11.52
S. rivulatus	186	12.0116
S. rivulatus	191.5	12.0323
S. rivulatus	194.5	3.96721
S. rivulatus	197	8.89091
S. rivulatus	200	11.6638
S. rivulatus	205.5	9.7125
S. rivulatus	206	8.93846
S. rivulatus	206	17.25
S. rivulatus	227.5	14.4
S. rivulatus	229	13.6667
S. rivulatus	243.5	13.8628
S. rivulatus	282	12.4706
S. rivulatus	284	12.02
S. rivulatus	289.5	13.6429
S. rivulatus	306	17.1304
S. rivulatus	308	17.2414
S. rivulatus	319.5	11.8889
