# Supplementary material for: Parrotfish grazing ability: interspecific differences in relation to jaw-lever mechanics and relative weight of adductor mandibulae on an Okinawan coral reef
Source: PeerJ. 2016 Sep 1;4:e2425. doi: 10.7717/peerj.2425 (PMC5012275; doi:10.7717/peerj.2425)
Supplement: Data S4 [file peerj-04-2425-s005.xlsx]

## Sheet: Sheet1
Figure 7A	Average	SD
C. sordidus	0.285197	0.014899
C. bowersi	0.259306	0.0183349
S. rivulatus	0.161111	0.0185632
S. niger	0.123906	0.011475
S. forsteni	0.108962	0.0087877
Figure 7B	Average	SD
C. sordidus	0.367291	0.0131141
C. bowersi	0.377062	0.00976964
S. rivulatus	0.36839	0.0162946
S. niger	0.344245	0.0197351
S. forsteni	0.34153	0.0146506
